# Supplementary material for: Assessing COVID-19 Pandemic Risk Perception and Response Preparedness in Veterinary and Animal Care Workers
Source: bioRxiv or medRxiv preprint supplement (doi:10.1101/2021.05.04.21256626), 2021-05-08
Supplement: Supplementary file [file media-1.pdf]

# Supplementary Analysis

## “Assessing COVID-19 Pandemic Risk Perception and Response Preparedness in Veterinary and Animal Care Workers”

Dalton et. al., 2021

### Supplemental Table 1 - Extended Job and Demographic Characteristics

| Job & Demographic Variables N(%)    | data (N = 1,577)  |
|-------------------------------------|-------------------|
| <b>US Region</b>                    |                   |
| Northeast/Mid-Atlantic              | 515 (33)          |
| Southeast                           | 243 (16)          |
| North Midwest                       | 281 (18)          |
| South Midwest                       | 133 (9)           |
| Mountain                            | 159 (10)          |
| Pacific                             | 186 (12)          |
| Outside Continental US              | 34 (2)            |
| <b>Area in Stay-at-Home Order</b>   |                   |
| Yes                                 | 949 (60)          |
| <b>Age</b>                          |                   |
| 18-29                               | 274 (17)          |
| 30-39                               | 541 (34)          |
| 40-49                               | 412 (26)          |
| 50-59                               | 224 (14)          |
| 60-69                               | 103 (7)           |
| 69+                                 | 16 (1)            |
| Prefer Not to Say                   | 4 (0)             |
| <b>Race/Ethnicity</b>               |                   |
| White                               | 1,374 (87)        |
| Hispanic / Latino                   | 66 (4)            |
| Black / African American            | 15 (1)            |
| Asian                               | 34 (2)            |
| Other                               | 82 (5)            |
| <b>Marital Status</b>               |                   |
| Married / Domestic Partnership      | 958 (61)          |
| Single / Divorced / Widowed         | 581 (37)          |
| Other / Prefer Not to Say           | 29 (2)            |
| <b>Household Number</b>             |                   |
| Min                                 | 0                 |
| Mean +/- SD                         | 2.62 ± 1.32       |
| Median (IQR)                        | 2.00 (2.00, 3.00) |
| Max                                 | 20                |
| <b>Dependent Number</b>             |                   |
| Min                                 | 0                 |
| Mean +/- SD                         | 0.68 ± 1.01       |
| Median (IQR)                        | 0.00 (0.00, 1.00) |
| Max                                 | 6                 |
| <b>Living with Essential Worker</b> |                   |
| Yes                                 | 695 (44)          |
| <b>Annual Household Income</b>      |                   |
| Less than \$50,000                  | 259 (17)          |

**Job & Demographic Variables N(%)**

**data (N = 1,577)**

|                        |          |
|------------------------|----------|
| \$50,001 – \$100,000   | 427 (27) |
| \$100,001 - \$200,000  | 561 (36) |
| Greater than \$200,000 | 187 (12) |
| Prefer Not to Say      | 124 (8)  |

## Supplemental Table 2 - Distribution of Likert Questions and Outcome Aggregated Scores

### Aggregated Knowledge Score

How knowledgeable are you regarding the ..... (1 = least knowledgeable, 5 = most knowledgeable)

| Label                                                                  | Stats / Values                                                               | Freqs (% of Valid)                                                                         | Graph | Valid           |
|------------------------------------------------------------------------|------------------------------------------------------------------------------|--------------------------------------------------------------------------------------------|-------|-----------------|
| Public health impacts of the pandemic in general?                      | Mean (sd) : 3.7 (0.7)<br>min < med < max:<br>1 < 4 < 5<br>IQR (CV) : 1 (0.2) | 1 : 11 ( 0.7%)<br>2 : 67 ( 4.3%)<br>3 : 498 (31.6%)<br>4 : 844 (53.6%)<br>5 : 156 ( 9.9%)  |       | 1576<br>(99.9%) |
| Your personal risk during the pandemic?                                | Mean (sd) : 4 (0.7)<br>min < med < max:<br>1 < 4 < 5<br>IQR (CV) : 0 (0.2)   | 1 : 8 ( 0.5%)<br>2 : 33 ( 2.1%)<br>3 : 253 (16.1%)<br>4 : 964 (61.2%)<br>5 : 316 (20.1%)   |       | 1574<br>(99.8%) |
| Ability to answer pandemic-related questions from clients or visitors? | Mean (sd) : 3.6 (0.8)<br>min < med < max:<br>1 < 4 < 5<br>IQR (CV) : 1 (0.2) | 1 : 14 ( 0.9%)<br>2 : 136 ( 8.6%)<br>3 : 449 (28.5%)<br>4 : 764 (48.6%)<br>5 : 210 (13.4%) |       | 1573<br>(99.7%) |
| Safety practices at work that are specific to COVID-19?                | Mean (sd) : 4.1 (0.8)<br>min < med < max:<br>1 < 4 < 5<br>IQR (CV) : 1 (0.2) | 1 : 6 ( 0.4%)<br>2 : 56 ( 3.6%)<br>3 : 202 (12.8%)<br>4 : 870 (55.3%)<br>5 : 439 (27.9%)   |       | 1573<br>(99.7%) |

### Aggregated Confidence Score

How confident are you regarding the ..... (1 = least confident, 5 = most confident)

| Label                                             | Stats / Values                                                               | Freqs (% of Valid)                                                                          | Graph | Valid           |
|---------------------------------------------------|------------------------------------------------------------------------------|---------------------------------------------------------------------------------------------|-------|-----------------|
| Your safety at work in general?                   | Mean (sd) : 3.8 (0.9)<br>min < med < max:<br>1 < 4 < 5<br>IQR (CV) : 1 (0.2) | 1 : 22 ( 1.4%)<br>2 : 104 ( 6.6%)<br>3 : 399 (25.3%)<br>4 : 708 (45.0%)<br>5 : 341 (21.7%)  |       | 1574<br>(99.8%) |
| Your safety at work that is specific to COVID-19? | Mean (sd) : 3.2 (1.2)<br>min < med < max:<br>1 < 3 < 5<br>IQR (CV) : 2 (0.4) | 1 : 132 ( 8.4%)<br>2 : 303 (19.3%)<br>3 : 471 (30.0%)<br>4 : 451 (28.7%)<br>5 : 215 (13.7%) |       | 1572<br>(99.7%) |

### Aggregated Threat Score

What is your likelihood of ..... (1 = least likely, 5 = most likely)

| Label                                                     | Stats / Values                                                               | Freqs (% of Valid)                                                                          | Graph | Valid           |
|-----------------------------------------------------------|------------------------------------------------------------------------------|---------------------------------------------------------------------------------------------|-------|-----------------|
| Being exposed to SARS-CoV-2 as part of your job function? | Mean (sd) : 3.1 (1.2)<br>min < med < max:<br>1 < 3 < 5<br>IQR (CV) : 2 (0.4) | 1 : 132 ( 8.4%)<br>2 : 354 (22.5%)<br>3 : 522 (33.1%)<br>4 : 342 (21.7%)<br>5 : 226 (14.3%) |       | 1576<br>(99.9%) |

| Label                                                                 | Stats / Values                                                               | Freqs (% of Valid)                                                                          | Graph | Valid           |
|-----------------------------------------------------------------------|------------------------------------------------------------------------------|---------------------------------------------------------------------------------------------|-------|-----------------|
| You becoming sick with COVID-19 disease as a result of your job?      | Mean (sd) : 2.8 (1.1)<br>min < med < max:<br>1 < 3 < 5<br>IQR (CV) : 2 (0.4) | 1 : 197 (12.5%)<br>2 : 430 (27.3%)<br>3 : 528 (33.5%)<br>4 : 282 (17.9%)<br>5 : 139 (8.8%)  |       | 1576<br>(99.9%) |
| Your co-workers becoming sick with COVID-19 as a result of their job? | Mean (sd) : 3 (1.2)<br>min < med < max:<br>1 < 3 < 5<br>IQR (CV) : 2 (0.4)   | 1 : 158 (10.1%)<br>2 : 381 (24.3%)<br>3 : 505 (32.1%)<br>4 : 331 (21.1%)<br>5 : 196 (12.5%) |       | 1571<br>(99.6%) |
| Becoming seriously ill with COVID-19 disease as a result of your job? | Mean (sd) : 3.3 (1.2)<br>min < med < max:<br>1 < 3 < 5<br>IQR (CV) : 2 (0.4) | 1 : 141 (9.0%)<br>2 : 315 (20.1%)<br>3 : 414 (26.4%)<br>4 : 400 (25.5%)<br>5 : 296 (18.9%)  |       | 1566<br>(99.3%) |
| You spreading SARS-CoV-2 to others around you?                        | Mean (sd) : 2.6 (1.2)<br>min < med < max:<br>1 < 3 < 5<br>IQR (CV) : 1 (0.4) | 1 : 282 (18.0%)<br>2 : 476 (30.4%)<br>3 : 447 (28.5%)<br>4 : 253 (16.1%)<br>5 : 110 (7.0%)  |       | 1568<br>(99.4%) |

Do you agree with the following statements .... (1 = strongly disagree, 5 = strongly agree)

| Label                                                                           | Stats / Values                                                               | Freqs (% of Valid)                                                                          | Graph | Valid            |
|---------------------------------------------------------------------------------|------------------------------------------------------------------------------|---------------------------------------------------------------------------------------------|-------|------------------|
| The COVID-19 pandemic has severe public health consequences to those around me. | Mean (sd) : 4.1 (1)<br>min < med < max:<br>1 < 4 < 5<br>IQR (CV) : 1 (0.3)   | 1 : 39 (2.5%)<br>2 : 89 (5.6%)<br>3 : 259 (16.4%)<br>4 : 436 (27.6%)<br>5 : 754 (47.8%)     |       | 1577<br>(100.0%) |
| The COVID-19 pandemic is likely to negatively influence my job role.            | Mean (sd) : 3.1 (1.3)<br>min < med < max:<br>1 < 3 < 5<br>IQR (CV) : 2 (0.4) | 1 : 242 (15.3%)<br>2 : 326 (20.7%)<br>3 : 374 (23.7%)<br>4 : 373 (23.7%)<br>5 : 262 (16.6%) |       | 1577<br>(100.0%) |
| I am at risk of COVID-19 disease because of my job role                         | Mean (sd) : 3.6 (1.2)<br>min < med < max:<br>1 < 4 < 5<br>IQR (CV) : 1 (0.3) | 1 : 109 (6.9%)<br>2 : 203 (12.9%)<br>3 : 281 (17.8%)<br>4 : 590 (37.4%)<br>5 : 394 (25.0%)  |       | 1577<br>(100.0%) |
| Others around me are at risk of COVID-19 disease because of my job role.        | Mean (sd) : 3.4 (1.3)<br>min < med < max:<br>1 < 4 < 5<br>IQR (CV) : 2 (0.4) | 1 : 169 (10.7%)<br>2 : 233 (14.8%)<br>3 : 308 (19.5%)<br>4 : 523 (33.2%)<br>5 : 344 (21.8%) |       | 1577<br>(100.0%) |

## Aggregated Efficacy Score

What is the importance of ..... (1 = least important, 5 = most important)

| Label                                                                                                         | Stats / Values                                                               | Freqs (% of Valid)                                                                      | Graph | Valid           |
|---------------------------------------------------------------------------------------------------------------|------------------------------------------------------------------------------|-----------------------------------------------------------------------------------------|-------|-----------------|
| Your job roles and responsibilities during a pandemic or other emergent situation?                            | Mean (sd) : 4.1 (0.9)<br>min < med < max:<br>1 < 4 < 5<br>IQR (CV) : 1 (0.2) | 1 : 18 (1.1%)<br>2 : 75 (4.8%)<br>3 : 266 (17.0%)<br>4 : 562 (35.8%)<br>5 : 647 (41.3%) |       | 1568<br>(99.4%) |
| Your individual role to the overall function of your workplace during a pandemic or other emergent situation? | Mean (sd) : 4.3 (0.9)<br>min < med < max:<br>1 < 5 < 5<br>IQR (CV) : 1 (0.2) | 1 : 22 (1.4%)<br>2 : 44 (2.8%)<br>3 : 211 (13.4%)<br>4 : 505 (32.2%)<br>5 : 788 (50.2%) |       | 1570<br>(99.6%) |

Do you agree with the following statements .... (1 = strongly disagree, 5 = strongly agree)

| Label                                                                                                                       | Stats / Values                                                               | Freqs (% of Valid)                                                                          | Graph | Valid            |
|-----------------------------------------------------------------------------------------------------------------------------|------------------------------------------------------------------------------|---------------------------------------------------------------------------------------------|-------|------------------|
| I am able to perform my duties successfully during the COVID-19 pandemic.                                                   | Mean (sd) : 4.2 (0.9)<br>min < med < max:<br>1 < 4 < 5<br>IQR (CV) : 1 (0.2) | 1 : 26 ( 1.6%)<br>2 : 85 ( 5.4%)<br>3 : 143 ( 9.1%)<br>4 : 658 (41.7%)<br>5 : 665 (42.2%)   |       | 1577<br>(100.0%) |
| My co-workers are able to perform their duties successfully during the COVID-19 pandemic.                                   | Mean (sd) : 4.1 (0.9)<br>min < med < max:<br>1 < 4 < 5<br>IQR (CV) : 1 (0.2) | 1 : 21 ( 1.3%)<br>2 : 115 ( 7.3%)<br>3 : 179 (11.4%)<br>4 : 692 (43.9%)<br>5 : 570 (36.1%)  |       | 1577<br>(100.0%) |
| If I perform my duties successfully, it will make a big difference in the success of the response to the COVID-19 pandemic. | Mean (sd) : 3.2 (1.2)<br>min < med < max:<br>1 < 3 < 5<br>IQR (CV) : 2 (0.4) | 1 : 169 (10.7%)<br>2 : 248 (15.7%)<br>3 : 496 (31.5%)<br>4 : 372 (23.6%)<br>5 : 292 (18.5%) |       | 1577<br>(100.0%) |

### Aggregated Barriers Score

What is your likelihood of ..... (1 = least likely, 5 = most likely)

| Label                                                                       | Stats / Values                                                               | Freqs (% of Valid)                                                                         | Graph | Valid           |
|-----------------------------------------------------------------------------|------------------------------------------------------------------------------|--------------------------------------------------------------------------------------------|-------|-----------------|
| Have personal barriers that prevent you from reporting to work on-site?     | Mean (sd) : 1.8 (1.1)<br>min < med < max:<br>1 < 1 < 5<br>IQR (CV) : 1 (0.6) | 1 : 896 (56.9%)<br>2 : 364 (23.1%)<br>3 : 176 (11.2%)<br>4 : 76 ( 4.8%)<br>5 : 62 ( 3.9%)  |       | 1574<br>(99.8%) |
| Have professional barriers that prevent you from reporting to work on-site? | Mean (sd) : 1.5 (0.9)<br>min < med < max:<br>1 < 1 < 5<br>IQR (CV) : 1 (0.6) | 1 : 1107 (70.6%)<br>2 : 286 (18.2%)<br>3 : 102 ( 6.5%)<br>4 : 39 ( 2.5%)<br>5 : 34 ( 2.2%) |       | 1568<br>(99.4%) |

### Aggregated Response Outcome Score

Each question aggregated separately to create the three response outcomes (ready, willing, able)

Do you agree with the following statements .... (1 = strongly disagree, 5 = strongly agree)

| Label                                                                    | Stats / Values                                                               | Freqs (% of Valid)                                                                        | Graph | Valid           |
|--------------------------------------------------------------------------|------------------------------------------------------------------------------|-------------------------------------------------------------------------------------------|-------|-----------------|
| I am prepared and ready to respond to work during the COVID-19 pandemic. | Mean (sd) : 4.5 (0.8)<br>min < med < max:<br>1 < 5 < 5<br>IQR (CV) : 1 (0.2) | 1 : 20 ( 1.3%)<br>2 : 41 ( 2.6%)<br>3 : 117 ( 7.5%)<br>4 : 383 (24.6%)<br>5 : 996 (64.0%) |       | 1557<br>(98.7%) |
| I am willing to respond to work during the COVID-19 pandemic.            | Mean (sd) : 4.5 (0.8)<br>min < med < max:<br>1 < 5 < 5<br>IQR (CV) : 1 (0.2) | 1 : 15 ( 1.0%)<br>2 : 35 ( 2.2%)<br>3 : 114 ( 7.3%)<br>4 : 412 (26.3%)<br>5 : 992 (63.3%) |       | 1568<br>(99.4%) |
| I feel I am able to respond to work during the COVID-19 pandemic.        | Mean (sd) : 4.6 (0.7)<br>min < med < max:<br>1 < 5 < 5<br>IQR (CV) : 1 (0.2) | 1 : 11 ( 0.7%)<br>2 : 20 ( 1.3%)<br>3 : 74 ( 4.7%)<br>4 : 372 (23.7%)<br>5 : 1090 (69.6%) |       | 1567<br>(99.4%) |

### Distribution of Aggregated Outcome Scores

| Label | Stats / Values | Freqs (% of Valid) | Graph | Valid |
|-------|----------------|--------------------|-------|-------|
|-------|----------------|--------------------|-------|-------|

| Label                        | Stats / Values | Freqs (% of Valid) | Graph | Valid           |
|------------------------------|----------------|--------------------|-------|-----------------|
| Aggregated Knowledge Score   | 1. Low         | 737 ( 47.1% )      |       | 1565<br>(99.2%) |
|                              | 2. High        | 828 ( 52.9% )      |       |                 |
| Aggregated Confidence Score  | 1. Low         | 906 ( 57.6% )      |       | 1572<br>(99.7%) |
|                              | 2. High        | 666 ( 42.4% )      |       |                 |
| Aggregated Threat Score      | 1. Low         | 721 ( 46.5% )      |       | 1550<br>(98.3%) |
|                              | 2. High        | 829 ( 53.5% )      |       |                 |
| Aggregated Efficacy Score    | 1. Low         | 656 ( 42.0% )      |       | 1562<br>(99.0%) |
|                              | 2. High        | 906 ( 58.0% )      |       |                 |
| Aggregated Barriers Score    | 1. Low         | 842 ( 53.8% )      |       | 1566<br>(99.3%) |
|                              | 2. High        | 724 ( 46.2% )      |       |                 |
| Aggregated Readiness Score   | 1. Low         | 561 ( 36.0% )      |       | 1557<br>(98.7%) |
|                              | 2. High        | 996 ( 64.0% )      |       |                 |
| Aggregated Willingness Score | 1. Low         | 576 ( 36.7% )      |       | 1568<br>(99.4%) |
|                              | 2. High        | 992 ( 63.3% )      |       |                 |
| Aggregated Ability Score     | 1. Low         | 477 ( 30.4% )      |       | 1567<br>(99.4%) |
|                              | 2. High        | 1090 ( 69.6% )     |       |                 |

## Supplemental Table 3 - Correlation Matrixes to test for Collinearity

job.n = job role, job\_time\_binary.n = time in job, job\_region = location, job\_home = stay-at-home orders, dem\_age = age, dem\_gender = gender, dem\_race = race/ethnicity, dem\_marital = marital status, dem\_housenum = household number, dem\_dependnum = number of household dependents, dem\_essential1 = living with an essential worker, dem\_salary1 = annual salary

### Correlation Matrix

|                   | job.n  | job_time_binary.n | job_region | job_leader | job_homedem | agedem | genderdem | racedem | maritaldem | housenumdem | dependnumdem | essential1dem |
|-------------------|--------|-------------------|------------|------------|-------------|--------|-----------|---------|------------|-------------|--------------|---------------|
| job.n             | 1      | 0.042             | 0.072      | -0.021     | -0.051      | 0.037  | 0.023     | -0.048  | 0.025      | 0.060       | 0.100        | -0.031        |
| job_time_binary.n | 0.042  | 1                 | 0.003      | 0.282      | -0.012      | 0.424  | -0.131    | 0.031   | 0.139      | 0.014       | 0.093        | -0.043        |
| job_region        | 0.072  | 0.003             | 1          | 0.031      | 0.095       | 0.035  | -0.009    | -0.014  | 0.020      | 0.023       | 0.031        | -0.004        |
| job_leader        | -0.021 | 0.282             | 0.031      | 1          | -0.043      | 0.270  | -0.095    | 0.030   | 0.094      | 0.086       | 0.139        | 0.049         |
| job_home          | -0.051 | -0.012            | 0.095      | -0.043     | 1           | 0.003  | 0.078     | 0.034   | -0.010     | -0.059      | -0.091       | 0.001         |
| dem_age           | 0.037  | 0.424             | 0.035      | 0.270      | 0.003       | 1      | -0.228    | 0.037   | 0.287      | 0.005       | 0.096        | -0.112        |
| dem_gender        | 0.023  | -0.131            | -0.009     | -0.095     | 0.078       | -0.228 | 1         | 0.090   | -0.032     | 0.001       | -0.032       | 0.004         |
| dem_race          | -0.048 | 0.031             | -0.014     | 0.030      | 0.034       | 0.037  | 0.090     | 1       | 0.073      | -0.023      | -0.023       | -0.064        |
| dem_marital       | 0.025  | 0.139             | 0.020      | 0.094      | -0.010      | 0.287  | -0.032    | 0.073   | 1          | 0.239       | 0.252        | 0.104         |
| dem_housenum      | 0.060  | 0.014             | 0.023      | 0.086      | -0.059      | 0.005  | 0.001     | -0.023  | 0.239      | 1           | 0.781        | 0.289         |
| dem_dependnum     | 0.100  | 0.093             | 0.031      | 0.139      | -0.091      | 0.096  | -0.032    | -0.023  | 0.252      | 0.781       | 1            | 0.132         |
| dem_essential1    | -0.031 | -0.043            | -0.004     | 0.049      | 0.001       | -0.112 | 0.004     | -0.064  | 0.104      | 0.289       | 0.132        | 1             |
| dem_salary1       | 0.197  | 0.140             | 0.043      | 0.165      | 0.015       | 0.315  | -0.126    | 0.016   | 0.174      | 0.241       | 0.188        | 0.100         |

No significance based on Spearman correlation statistic

## Supplemental Table 4 - Chi-Squared Comparison in Key Variables between Complete and Non-Complete Survey Respondents

Differences in job and demographic factors between respondents who completed all sections of the survey and those who did not

| Variable                        | Chi-Squared p-value |
|---------------------------------|---------------------|
| Job Role                        | 0.002               |
| Time in Job                     | 0.4298              |
| Leadership Role                 | 0.1589              |
| Age                             | 0.001               |
| Gender                          | 0.2004              |
| US Region                       | 0.5612              |
| Area in Stay-at-Home Order      | 0.2529              |
| Race                            | 0.9595              |
| Marital Status                  | 0.5752              |
| Dependent Number                | 0.2469              |
| Living with an Essential Worker | 0.933               |
| Annual Household Income         | 0.4593              |
